# Supplementary material
Source: PubMed Central journal article supplement (PMC2951321)
Supplement: NIHMS180404-supplement-Supplementary_Appendix.pdf [file NIHMS180404-supplement-Supplementary_Appendix.pdf]

## Supplementary Appendix

This appendix has been provided by the authors to give readers additional information about their work.

Supplement to: Slichter SJ, Kaufman RM, Assmann SF, et al. Dose of prophylactic platelet transfusions and prevention of hemorrhage. *N Engl J Med* 2010;362:xxx-xx.

**Supplement: Platelet Dose Trial Bleeding Scale**

|                                           | <b>Grade 1</b>                                                                                                                                                                                                                                                                                              | <b>Grade 2</b>                                                                                                                                                                                                                                                                                     | <b>Grade 3</b>                                                                                                              |
|-------------------------------------------|-------------------------------------------------------------------------------------------------------------------------------------------------------------------------------------------------------------------------------------------------------------------------------------------------------------|----------------------------------------------------------------------------------------------------------------------------------------------------------------------------------------------------------------------------------------------------------------------------------------------------|-----------------------------------------------------------------------------------------------------------------------------|
| <b>Oral and nasal</b>                     | <ul style="list-style-type: none"> <li>➤ Oropharyngeal bleeding – total duration of all episodes in previous 24 hours <math>\leq</math> 30 minutes*</li> <li>➤ Petechiae of oral mucosa</li> <li>➤ Epistaxis – total duration of all episodes in previous 24 hours <math>\leq</math> 30 minutes*</li> </ul> | <ul style="list-style-type: none"> <li>➤ Oropharyngeal bleeding – total duration of all episodes in previous 24 hours <math>&gt;</math> 30 minutes*</li> <li>➤ Epistaxis – total duration of all episodes in previous 24 hours <math>&gt;</math> 30 minutes*</li> </ul>                            | <ul style="list-style-type: none"> <li>◆ Any bleeding requiring RBC transfusion over routine transfusion needs**</li> </ul> |
| <b>Skin, soft tissue, musculoskeletal</b> | <ul style="list-style-type: none"> <li>➤ Petechiae of skin</li> <li>➤ Purpura <math>\leq</math> 1 inch diameter</li> <li>➤ One or more spontaneous hematomas in the soft tissue or muscle <math>&gt;</math> 1 <i>inch</i></li> </ul>                                                                        | <ul style="list-style-type: none"> <li>➤ Purpura <math>&gt;</math> 1 inch diameter</li> <li>➤ Spontaneous hematoma in deeper tissues</li> <li>➤ Joint bleeding (confirmed by aspiration, imaging study or other accepted technique)</li> </ul>                                                     | <ul style="list-style-type: none"> <li>◆ Any bleeding requiring RBC transfusion over routine transfusion needs**</li> </ul> |
| <b>Gastrointestinal</b>                   | <ul style="list-style-type: none"> <li>➤ Positive stool occult blood test [<i>This was not assessed in PLADO</i>]</li> </ul>                                                                                                                                                                                | <ul style="list-style-type: none"> <li>➤ Melanotic stool</li> <li>➤ Hematochezia – visible red blood mixed in stool, not requiring a transfusion</li> <li>➤ Hematemesis – Grossly visible blood in emesis or in nasogastric drainage tube (not related or secondary to swallowed blood)</li> </ul> | <ul style="list-style-type: none"> <li>◆ Any bleeding requiring RBC transfusion over routine transfusion needs**</li> </ul> |

|                                      |                                                                                                                                                                                                                                                                                                                                                                            |                                                                                                                                                                                                                                                                                                                                     |                                                                                                                                                                                                     |
|--------------------------------------|----------------------------------------------------------------------------------------------------------------------------------------------------------------------------------------------------------------------------------------------------------------------------------------------------------------------------------------------------------------------------|-------------------------------------------------------------------------------------------------------------------------------------------------------------------------------------------------------------------------------------------------------------------------------------------------------------------------------------|-----------------------------------------------------------------------------------------------------------------------------------------------------------------------------------------------------|
| <p><b>Genitourinary</b></p>          | <ul style="list-style-type: none"> <li>➤ Any biochemical or microscopic Hb/RBCs without red urine [<i>This was not assessed in PLADO</i>]</li> <li>➤ Abnormal vaginal bleeding (Unexpected bleeding out of normal cycle <b>OR</b> Bleeding heavier than normal <b>OR</b> Breakthrough bleeding (patient on hormonal therapy to prevent bleeding)) with spotting</li> </ul> | <ul style="list-style-type: none"> <li>➤ Gross/visible hematuria without need for transfusion</li> <li>➤ Abnormal vaginal bleeding (Unexpected bleeding out of normal cycle <b>OR</b> Bleeding heavier than normal <b>OR</b> Breakthrough bleeding (patient on hormonal therapy to prevent bleeding)) more than spotting</li> </ul> | <ul style="list-style-type: none"> <li>◆ Any bleeding requiring RBC transfusion over routine transfusion needs**</li> </ul>                                                                         |
| <p><b>Pulmonary</b></p>              |                                                                                                                                                                                                                                                                                                                                                                            | <ul style="list-style-type: none"> <li>➤ Hemoptysis – Visible blood</li> <li>➤ Blood in broncho-pulmonary lavage, or blood tinged sputum (excluding those with nose or oropharyngeal bleeding)</li> </ul>                                                                                                                           | <ul style="list-style-type: none"> <li>◆ Any bleeding requiring RBC transfusion over routine transfusion needs**</li> </ul>                                                                         |
| <p><b>Body Cavity</b></p>            |                                                                                                                                                                                                                                                                                                                                                                            | <ul style="list-style-type: none"> <li>➤ Visible blood in body cavity fluid (e.g. red cells apparent in fluid aspirate) short of criteria for Grade 3 or 4</li> </ul>                                                                                                                                                               | <ul style="list-style-type: none"> <li>➤ Grossly bloody body cavity fluids and organ dysfunction with symptoms, and/or need to intervene (e.g. to aspirate), and/or need for transfusion</li> </ul> |
| <p><b>Central Nervous System</b></p> |                                                                                                                                                                                                                                                                                                                                                                            | <ul style="list-style-type: none"> <li>➤ Retinal bleeding without visual impairment</li> <li>➤ Lumbar puncture with blood (&gt;5 RBC/<math>\mu</math>L in CSF on microscopic analysis and non-traumatic tap), no symptoms and no visible red color</li> </ul>                                                                       | <ul style="list-style-type: none"> <li>➤ Lumbar puncture with visible red color in absence of symptoms, and non-traumatic tap</li> </ul>                                                            |

|                                                                                                                                                                                                                                          |  |                                                                                                                                                                                |                                                                                                                                                                                                                            |
|------------------------------------------------------------------------------------------------------------------------------------------------------------------------------------------------------------------------------------------|--|--------------------------------------------------------------------------------------------------------------------------------------------------------------------------------|----------------------------------------------------------------------------------------------------------------------------------------------------------------------------------------------------------------------------|
| <b>Invasive Sites</b>                                                                                                                                                                                                                    |  | ➤ Bleeding at invasive sites (venipuncture sites, intravenous lines or catheter exit sites): active oozing at site for a cumulative total of > 1 hour in the previous 24 hours | ◆ Any bleeding requiring RBC transfusion over routine transfusion needs**                                                                                                                                                  |
| <b>Hemodynamic Instability</b>                                                                                                                                                                                                           |  |                                                                                                                                                                                | ➤ Any bleeding associated with moderate hemodynamic instability (hypotension; >30mmHg fall or >30% decrease in either systolic or diastolic blood pressure) and requiring RBC transfusion over routine transfusion needs** |
| <p>* Count actual bleeding (i.e. “running out” or need for basin, Kleenex, towel, etc.) not minor bleeding</p> <p>** Red cell transfusion must be specifically related to treatment of bleeding within 24 hours of onset of bleeding</p> |  |                                                                                                                                                                                |                                                                                                                                                                                                                            |

**GRADE 4:**

- ◆ Any bleeding associated with severe hemodynamic instability (hypotension; >50mm/Hg fall or >50% decrease in either systolic or diastolic blood pressure, with associated tachycardia (heart rate increase of  $\geq$  20% for 20 minutes) and requiring RBC transfusion over routine transfusion needs
- ◆ Fatal bleeding from any source
- ◆ Retinal bleeding with visual impairment (Visual impairment is defined as a field deficit, and patients with suspected visual impairment require an ophthalmologic consult for documentation)
- ◆ CNS symptoms with non-traumatic bloody lumbar puncture
- ◆ CNS bleeding on imaging study with or without dysfunction
